# Supplementary material for: Mapping Epidemiology's Past to Inform Its Future: Metaknowledge Analysis of Epidemiologic Topics in Leading Journals, 1974–2013
Source: Oxford University Press journal article supplement (doi:10.1093/aje/kwv034), 2015-05-14

Web Table 1: definitions of epidemiology retrieved from 70 epidemiology textbooks

| Ref | Year | Definition                                                                                                                                                                                                                                       |
|-----|------|--------------------------------------------------------------------------------------------------------------------------------------------------------------------------------------------------------------------------------------------------|
| 1   | 1931 | The science of the infective diseases—their prime causes, propagation and prevention                                                                                                                                                             |
| 2   | 1956 | The field of medical science which is concerned with the relationships of the various factors and conditions that determine the frequencies and distributions of an infectious process, a disease, or a physiological state in a human community |
| 3   | 1957 | The study of health and disease of population and groups in relation to their environment and ways of living                                                                                                                                     |
| 4   | 1960 | The study of the distribution and determinants of disease prevalence in man                                                                                                                                                                      |
| 5   | 1961 | The science of the objective laws underlying the origin, spread and decline of infectious diseases in human population groups and of the prophylaxis and eradication of these diseases                                                           |
| 6   | 1963 | The study of the laws governing the distribution of disease in the community                                                                                                                                                                     |
| 7   | 1970 | The study of factors determining the occurrence of disease in populations                                                                                                                                                                        |
| 8   | 1970 | The study of the distribution and determinants of disease frequency in man                                                                                                                                                                       |
| 9   | 1970 | The study of disease distributions and the factors that influence them                                                                                                                                                                           |
| 10  | 1973 | The study of the factors determining the frequency and distribution of disease in human populations                                                                                                                                              |
| 11  | 1973 | The study of distribution and determinants of states of health in human populations for the purpose of prevention, surveillance, and control of health disorders in populations                                                                  |
| 12  | 1974 | The study of the distribution and determinants of diseases and injuries in populations                                                                                                                                                           |
| 13  | 1974 | The study of disease occurrence in human populations                                                                                                                                                                                             |
| 14  | 1975 | The basic science of preventive and community medicine                                                                                                                                                                                           |
| 15  | 1976 | Methods and strategies used to identify and study that which determines the level and distribution of health and disease in the community                                                                                                        |

| Ref | Year | Definition                                                                                                                                                                                                 |
|-----|------|------------------------------------------------------------------------------------------------------------------------------------------------------------------------------------------------------------|
| 16  | 1979 | The study of the distribution and determinants of disease in human populations                                                                                                                             |
| 17  | 1980 | The study of the distribution and dynamics of disease in populations                                                                                                                                       |
| 18  | 1982 | The study of health and illness in human populations                                                                                                                                                       |
| 19  | 1984 | The provision of preventive and curative services using modern epidemiologic technics in assessing health needs of population groups, the setting of priorities, and the assessment of results achieved    |
| 20  | 1985 | The discipline of how to study the occurrence of phenomena of interest in the health field                                                                                                                 |
| 21  | 1986 | The study of variation in the occurrence of disease, and the reasons for that variation                                                                                                                    |
| 22  | 1986 | The study of the occurrence and distribution of disease and other health-related conditions in populations                                                                                                 |
| 23  | 1987 | The study of the distribution and determinants of disease frequency in human populations                                                                                                                   |
| 24  | 1990 | The science of occurrence of diseases in human populations                                                                                                                                                 |
| 25  | 1994 | The study of the distribution of a disease or a physiological condition in human populations and of the factors that influence this distribution                                                           |
| 26  | 1994 | The study of the distribution and determinants of health-related states or events in specified populations, and the application of this study to control of health problems                                |
| 27  | 1995 | The study of disease occurrence                                                                                                                                                                            |
| 28  | 1996 | Concerned with the distribution and determinants of health and disease, morbidity, injuries, disabilities, and mortality in populations                                                                    |
| 29  | 1998 | The investigative method used to detect the cause or source of diseases, disorders, syndromes, conditions, or perils that cause pain, injury, illness, disability, or death in human populations or groups |
| 30  | 2000 | Formulating study designs to provide unbiased evidence for testing hypotheses by applying methods for gathering and using data from populations or groups of people                                        |

| Ref | Year | Definition                                                                                                                                                                                                        |
|-----|------|-------------------------------------------------------------------------------------------------------------------------------------------------------------------------------------------------------------------|
| 31  | 2000 | The study of the distribution and determinants of states of health in populations                                                                                                                                 |
| 32  | 2001 | The study of the distribution and determinants of health-related states or events in specified populations, and the application of this study to control of health problems                                       |
| 33  | 2002 | The study of the distribution and determinants of disease frequency, or, put even more simply, the study of the occurrence of illness                                                                             |
| 34  | 2003 | The study of how often diseases occur in different groups of people and why                                                                                                                                       |
| 35  | 2003 | The study of the distribution and determinants of disease frequency in human populations and the application of this study to control health problems                                                             |
| 36  | 2004 | The study of the distribution of disease and its determinants in human populations                                                                                                                                |
| 37  | 2005 | The study of the distribution and determinants of disease in human populations                                                                                                                                    |
| 38  | 2005 | The science that focuses on the occurrence of disease in its broadest sense, with the fundamental aim to understand and to control its causes                                                                     |
| 39  | 2005 | The study of the distribution and determinants of diseases within human populations                                                                                                                               |
| 40  | 2005 | The study of disease occurrence in human populations                                                                                                                                                              |
| 41  | 2006 | The study of the distribution and determinants of diseases in populations                                                                                                                                         |
| 42  | 2006 | The study of the distribution and determinants of states of health in populations                                                                                                                                 |
| 43  | 2007 | A broad-based population science, drawing on many disciplines from biology and sociology to biostatistics and philosophy of science, which investigates the causes of human disease and methods for their control |
| 44  | 2007 | The study of factors that determine the occurrence and distribution of disease in a population                                                                                                                    |
| 45  | 2007 | The study of the distribution and determinants of health-related states or events in human populations and the application of this study to the control of health problems.                                       |

| Ref | Year | Definition                                                                                                                                                                                                                     |
|-----|------|--------------------------------------------------------------------------------------------------------------------------------------------------------------------------------------------------------------------------------|
| 46  | 2008 | The study of the frequency and determinants of morbidity and mortality in populations                                                                                                                                          |
| 47  | 2008 | The study of the distribution of health-related states and events in populations                                                                                                                                               |
| 48  | 2008 | The science and craft that studies the pattern of diseases (and health, though usually indirectly) in populations to help understand both their causes and the burden they impose                                              |
| 49  | 2008 | The study of the distribution, determinants, and deterrents of morbidity and mortality in human populations                                                                                                                    |
| 50  | 2008 | The science and practice that describes and explains disease patterns in populations, and puts this knowledge to prevent and control disease and improve health                                                                |
| 51  | 2009 | The study of the distribution of health needs, including disease, impairments, disability, injuries, and other health problems in human populations and the factor contributing to their emergence, severity, and consequences |
| 52  | 2009 | The study of the distributions and determinants of states of health in human populations                                                                                                                                       |
| 53  | 2009 | A combination of knowledge and research methods concerned with the distribution and determinants of health and illness in populations and with contributors to health and control of health problems.                          |
| 54  | 2009 | The study of how disease is distributed in populations and the factors that influence or determine this distribution                                                                                                           |
| 55  | 2010 | The study of the distribution and determinants of health-related states or events in human populations and the application of this study to the prevention and control of health problems                                      |
| 56  | 2010 | The study of health and disease in populations                                                                                                                                                                                 |
| 57  | 2010 | The methodology to obtain information on the distribution in the community of diseases and their determinants, eg, according to characteristics of time, place, gender, age and often occupation                               |
| 58  | 2010 | The object of research, to identify determinants that change the occurrence of health phenomena in human populations                                                                                                           |
| 59  | 2011 | The study of the distribution and determinants of health states or events in specified populations, and the application of this study to control health problems                                                               |
| 60  | 2011 | The study of factors affecting the health and illness of populations                                                                                                                                                           |

| Ref   | Year                                                                                                                                   | Definition                                                                                                                                                                                                                                                           |
|-------|----------------------------------------------------------------------------------------------------------------------------------------|----------------------------------------------------------------------------------------------------------------------------------------------------------------------------------------------------------------------------------------------------------------------|
| 61    | 2011                                                                                                                                   | The study of the distribution and determinants of health-related states or events in specified populations and the application of this study to the control of the health problems                                                                                   |
| 62    | 2012                                                                                                                                   | The science of the distribution of diseases and other healthrelated features in human populations and of the factors that influence this distribution                                                                                                                |
| 63    | 2012                                                                                                                                   | The study of the distribution and determinants of health and illness in populations                                                                                                                                                                                  |
| 64    | 2013                                                                                                                                   | The methodological discipline providing principles and practical guidelines for creating new quantitative evidence relevant for clinical and community medicine                                                                                                      |
| 65    | 2013                                                                                                                                   | The study of the distribution and determinants of health and disease in populations                                                                                                                                                                                  |
| 66    | 2013                                                                                                                                   | The study of the distribution and determinants of disease and other health states in human populations by means of group comparisons for the purpose of improving population health                                                                                  |
| 67    | 2014                                                                                                                                   | The study of the occurrence and distribution of health-related events, states, and processes in specified populations, including the study of the determinants influencing such processes, and the application of this knowledge to control relevant health problems |
| 68    | 2014                                                                                                                                   | Concerned with the occurrence, distribution and determinants of health-related states or events (eg, health and diseases, morbidity, injuries, disability, and mortality in populations                                                                              |
| 69    | 2014                                                                                                                                   | The science of understanding the causes and distribution of population health so that we may intervene to prevent disease and promote health                                                                                                                         |
| 70    | 2014                                                                                                                                   | The study of the distribution and determinants of health-related states or events (including disease), and the application of this study to the control of diseases and other health problems                                                                        |
| <hr/> |                                                                                                                                        |                                                                                                                                                                                                                                                                      |
| 1.    | <b>Stallybrass C. The principles of epidemiology and the process of infection. 1st ed. London: G. Routledge &amp; son, ltd.; 1931.</b> |                                                                                                                                                                                                                                                                      |
| 2.    | <b>Rosenau M, Maxcy K. Rosenau preventive medicine and public health. 1st ed. New York: Appleton-Century-Crofts; 1956.</b>             |                                                                                                                                                                                                                                                                      |
| 3.    | <b>Morris JN. Uses of Epidemiology. Edinburgh: Churchill Livingston, 1957.</b>                                                         |                                                                                                                                                                                                                                                                      |
| 4.    | <b>MacMahon B. Epidemiologic methods. 1st ed. Boston: Little, Brown; 1960.</b>                                                         |                                                                                                                                                                                                                                                                      |
| 5.    | <b>Elkin I, Alymov A. A course in epidemiology. 1st ed. New York: Pergamon Press; 1961.</b>                                            |                                                                                                                                                                                                                                                                      |
| 6.    | <b>Pemberton. Epidemiology. 1st ed. London: Oxford University Press; 1963.</b>                                                         |                                                                                                                                                                                                                                                                      |
| 7.    | <b>Fox J, Hall C, Elveback L. Epidemiology: Man and Disease. 1st ed. New York: Macmillan; 1970.</b>                                    |                                                                                                                                                                                                                                                                      |

8. MacMahon B, Pugh T. Epidemiology. 1st ed. Boston: Little, Brown and company; 1970.
9. Winklestein W Jr, French FE, Lane JM (eds.). Basic Readings in Epidemiology. New York: MSS Educational Pub. Co.; 1970
10. Lowe C, Kostrzewski J. Epidemiology. 1st ed. London: published for the International Epidemiological Association by Churchill Livingstone; 1973.
11. Susser M. Causal thinking in the health sciences. 1st ed. New York: Oxford University Press; 1973.
12. Mausner J, Bahn A. Epidemiology. 1st ed. Philadelphia, Pa.: Saunders; 1974.
13. Friedman G. Primer of epidemiology. 1st ed. New York: McGraw-Hill; 1974.
14. Morris J. Uses of epidemiology. 1st ed. Edinburgh: Churchill Livingstone : distributed in the U.S.A. by Longman; 1975.
15. White K, Henderson M. Epidemiology as a fundamental science, its uses in health services planning, administration, and evaluation. 1st ed. New York: Oxford University Press; 1976.
16. Barker DJP, Rose G. Epidemiology in Medical Practice. 2nd ed. Edinburgh: Churchill Livingstone, 1979
17. Rosenau M, Maxey K, Last J. Maxcy-Rosenau public health and preventive medicine. 1st ed. New York: Appleton-Century-Crofts; 1980.
18. Kleinbaum D, Kupper L, Morgenstern H. Epidemiologic research. 1st ed. Belmont, Calif.: Lifetime Learning Publications; 1982.
19. Dever G, Champagne F. Epidemiology in health services management. 1st ed. Rockville, MD.: Aspen Systems Corp.; 1984.
20. Miettinen O. Theoretical epidemiology. 1st ed. New York: Wiley; 1985.
21. Weiss N. Clinical epidemiology. 1st ed. Oxford: Oxford University Press; 1986
22. Kelsey J, Thompson W, Evans A. Methods in observational epidemiology. 1st ed. New York: Oxford University Press; 1986
23. Hennekens C, Buring J, Mayrent S. Epidemiology in medicine. 1st ed. Boston: Little, Brown; 1987
24. Ahlbom A, Norell S. Introduction to Modern Epidemiology. Chestnut Hill, MA: Epidemiology Resources, 1990.
25. Lilienfeld D, Stolley P, Lilienfeld A. Foundations of epidemiology. 1st ed. New York: Oxford University Press; 1994.
26. Vuylsteek K, Hallen M. Epidemiology. 1st ed. Amsterdam: IOS Press; 1994.
27. Norell S. Workbook of epidemiology. 1st ed. New York: Oxford University Press; 1995
28. Friis RH, Sellers TA. Epidemiology for Public Health Practice. Gaithersburg, MD: Aspen Publishers, 1996
29. Timmreck T. An introduction to epidemiology. 1st ed. Boston: Jones and Bartlett; 1998.

30. Gail M, Benichou J. Encyclopedia of epidemiologic methods. 1st ed. Chichester: Wiley; 2000.
31. Berkman LF, Kawachi I (eds). Social Epidemiology. New York: Oxford University Press, 2000.
32. Last J. A dictionary of epidemiology. 1st ed. New York: Oxford University Press; 2001.
33. Rothman K. Epidemiology: An Introduction. New York: Oxford University Press, 2002.
34. Coggon D, Rose G, Barker D. Epidemiology for the uninitiated. 1st ed. London: BMJ Books; 2003.
35. Aschengrau, A, Seage GR. Essentials of Epidemiology in Public Health. Sudbury, MA: Jones and Bartlett, 2003.
36. Silman A, Macfarlane G. Epidemiological studies. 2nd ed. Cambridge: Cambridge University Press; 2004.
37. Woodward M. Epidemiology. 1st ed. Boca Raton: Chapman & Hall/CRC; 2005.
38. Ahrens W, Pigeot I. Handbook of epidemiology. 1st ed. Berlin: Springer; 2005.
39. Greenberg R. Medical epidemiology. 1st ed. New York: Lange Medical Books/McGraw-Hill; 2005.
40. Fletcher RH, Fletcher SW. Clinical Epidemiology: The Essentials. 4th ed. Baltimore, MD: Lippincott Williams & Wilkins, 2005
41. Strom B, Kimmel S. Textbook of pharmacoepidemiology. 1st ed. Chichester, West Sussex, England: John Wiley & Sons; 2006.
42. Oakes JM, Kaufman JS (eds). Methods in Social Epidemiology. San Francisco, CA: Jossey-Bass, 2006
43. Yarnell J (ed). Epidemiology and Prevention: A Systems-Based Approach. Oxford: Oxford University Press, 2007
44. Jekel J, Jekel J. Epidemiology, biostatistics, and preventive medicine. 1st ed. Philadelphia: Saunders/Elsevier; 2007
45. Carr S, Unwin N, Pless-Mulloli T. An introduction to public health and epidemiology. 1st ed. Maidenhead: McGraw Hill Open University Press; 2007.
46. Boslaugh S. Encyclopedia of epidemiology. 1st ed. Thousand Oaks Calif.: Sage Publications; 2008.
47. Rothman K, Greenland S, Lash T. Modern epidemiology. 1st ed. Philadelphia: Wolters Kluwer / Lippincott Williams & Wilkins; 2008.
48. Bhopal R. Concepts of epidemiology. 1st ed. Oxford: Oxford University Press; 2008.
49. Oleckno W. Epidemiology. 1st ed. Long Grove, Ill.: Waveland Press; 2008.
50. Kirch W. Encyclopedia of Public Health. 1st ed. New York: Springer; 2008.
51. Oleske D. Epidemiology and the delivery of health care services. 1st ed. New York: Springer; 2009.

52. Susser M, Stein Z. Eras in epidemiology. 1st ed. Oxford: Oxford University Press; 2009.
53. Streiner D, Norman G. PDQ epidemiology. 1st ed. Shelton, CT: People's Medical Publishing House; 2009.
54. Gordis L. Epidemiology. 4th ed. Philadelphia: Elsevier/Saunders; 2009
55. Merrill R. Introduction to epidemiology. 1st ed. Sudbury, Mass.: Jones and Bartlett Publishers; 2010.
56. Saracci R. Epidemiology: a very short introduction. 1st ed. Oxford: OUP Oxford; 2010.
57. Killewo J, Heggenhougen K, Quah S. Epidemiology and demography in public health. 1st ed. San Diego, CA: Academic Press/Elsevier; 2010
58. Olsen J. An introduction to epidemiology for health professionals. 1st ed. New York: Springer; 2010
59. Carneiro I, Howard N. Introduction to epidemiology. 1st ed. Maidenhead, Berkshire: Open University Press; 2011.
60. Fos P. Epidemiology foundations. 1st ed. San Francisco, CA: Jossey-Bass; 2011.
61. Büttner P, Muller R. Epidemiology. 1st ed. South Melbourne, Vic.: Oxford University Press; 2011.
62. Krickeberg K, Phạm V, Phạm T. Epidemiology. 1st ed. New York, NY: Springer; 2012.
63. Ward H. Oxford handbook of epidemiology for clinicians. 1st ed. Oxford: Oxford University Press; 2012.
64. Broeck J, Brestoff J. Epidemiology. 1st ed. Dordrecht: Springer; 2013.
65. Gerstman B. Epidemiology kept simple. 1st ed. Chichester, West Sussex: John Wiley & Sons; 2013.
66. Broadbent A. Philosophy of epidemiology. 1st ed. Basingstoke: Palgrave Macmillan; 2013.
67. Porta M, Greenland S, Hernán M, Silva I, Last J. A dictionary of epidemiology. 6th ed. Oxford: Oxford University Press; 2014.
68. Friis R, Sellers T. Epidemiology for public health practice. 5th ed. Burlington, Mass.: Jones & Bartlett Learning; 2014.
69. Keyes K, Galea S. Epidemiology matters. 1st ed. Oxford: Oxford University Press; 2014.
70. WHO Int. WHO | Epidemiology [Internet]. Published 2013/08/21; Updated 2014/11/20; Last Accessed 2014/6/24. Available from: <http://www.who.int/topics/epidemiology/en/>



Web Figure 1: Word cloud illustrating the definitions of epidemiology in 70 textbooks published between 1931 and 2014

**We extracted the definitions from 70 epidemiology textbooks published between 1931 and 2014 (Supplementary Table 1). We removed stop words and words appearing 2 times or less.**

Web Figure 2: Top 100 burst words over 1974-2013

**The temporal bar graph shows each burst word as a horizontal bar from the start to the end of the burst. The bar width is proportional to the intensity of the burst. Bars are color-coded according to the major epidemiology topics, as previously. Uncolored bars correspond to burst words that did not belong to any particular cluster.**

Web Figure 3A-3E: Mapping and clustering of terms in 6 high-impact general medicine journals for A) 1974-1989, B) 1990-1995 C) 1996-2001 D) 2002-2007 and E) 2008-2013

**We retrieved articles most likely of relevance to the field of epidemiology by using a custom search filter. The maps show terms as labeled nodes. Node size is proportional to the term frequency of occurrence (the larger the node the more articles include the term). Terms that are far away from each other do not or almost not occur together in the same article, while terms with high co-occurrence are close to each other. The clustering of the terms is displayed on top of the map by coloring nodes based on the cluster to which they belong. Clusters of terms are interpreted as major epidemiology topics and clusters located close to each other in the map indicate related topics.**

knowledge frequency  
determine morbidity  
problems states  
study  
population  
events causes illness mortality science  
injuries occurrence groups  
influence control methods health  
determinants specified  
disease factors  
prevention application  
community human  
healthrelated  
distribution

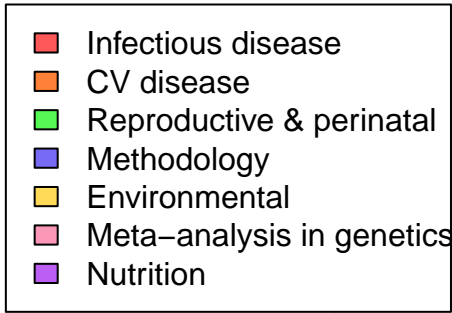

1970 1975 1980 1985 1990 1995 2000

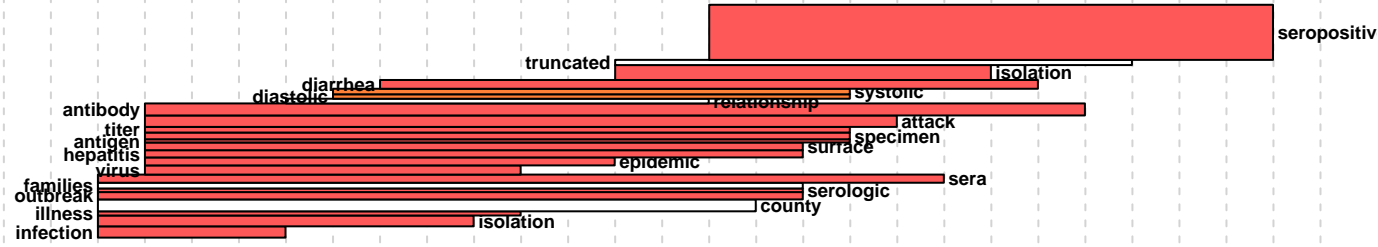

ender

2000 2005 2010 2015

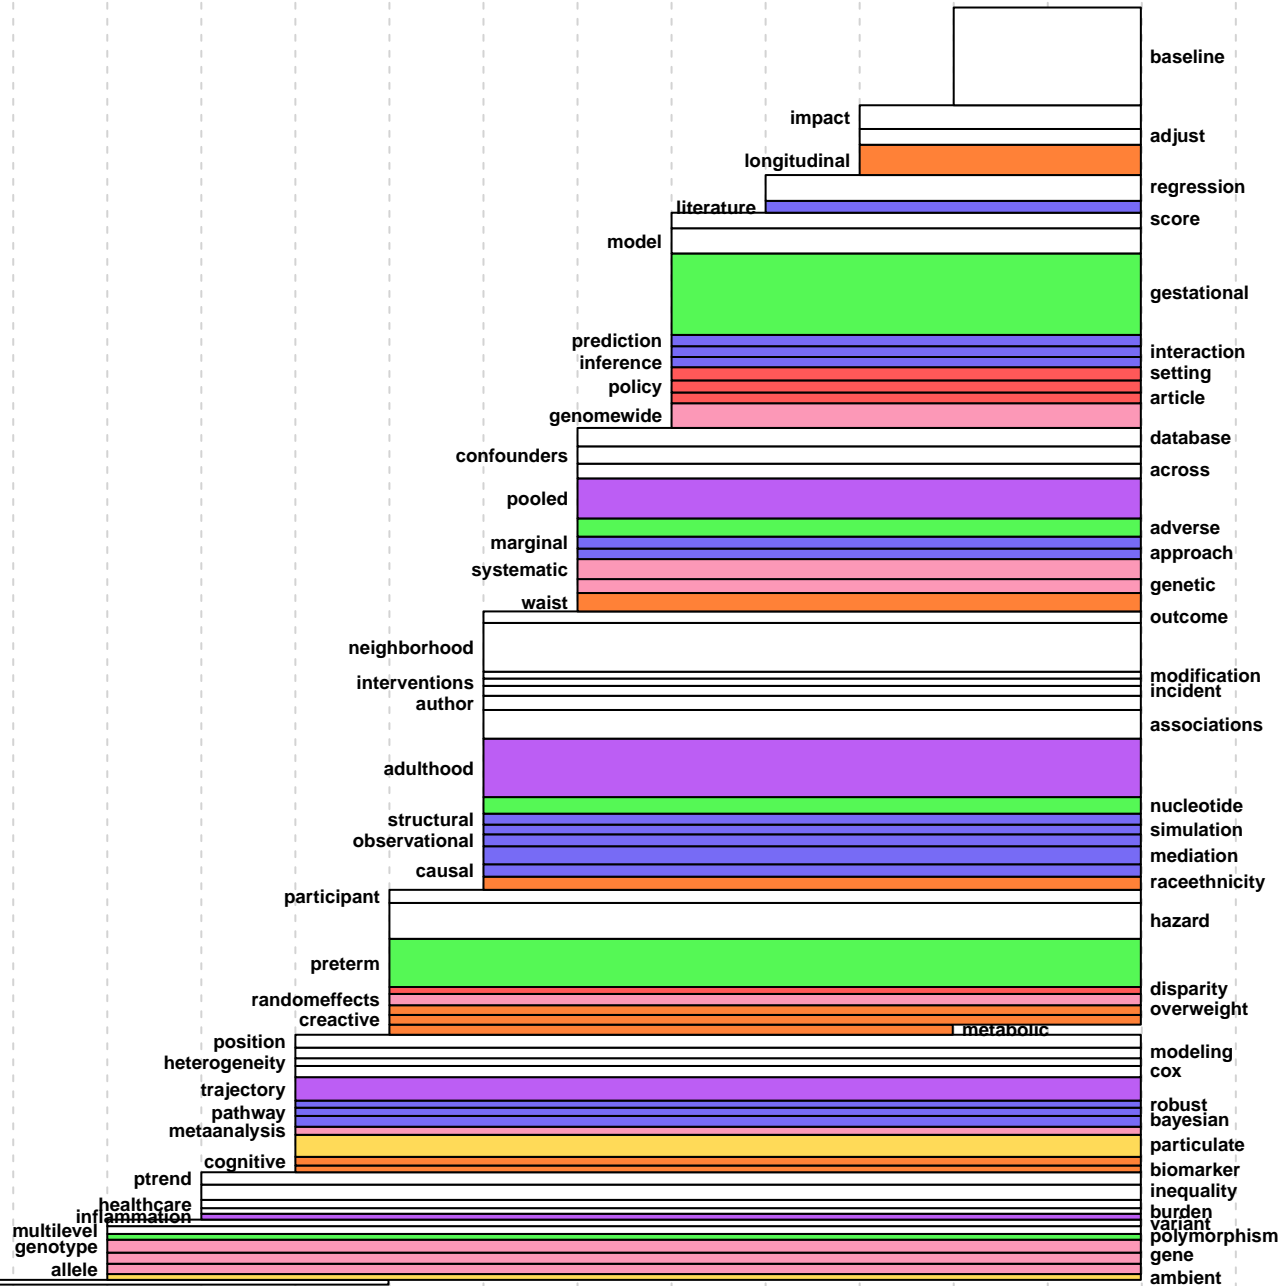

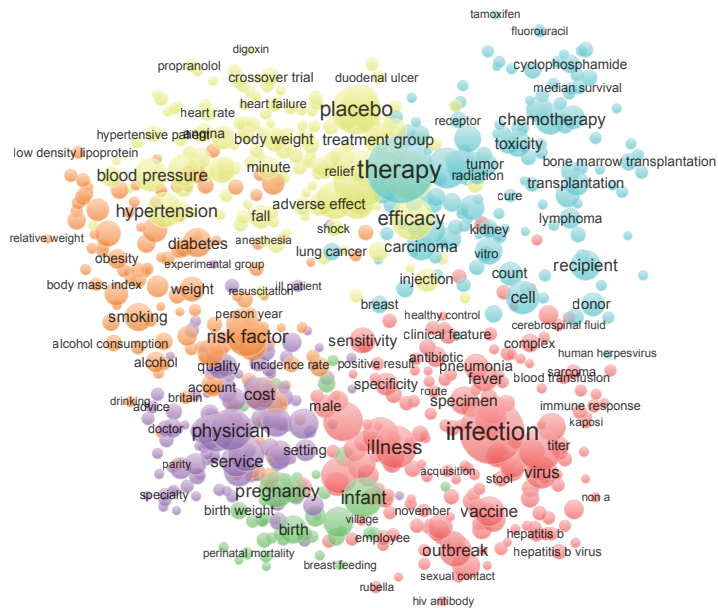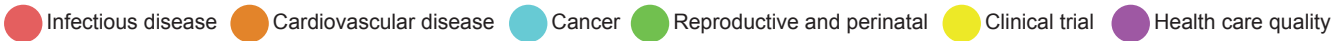

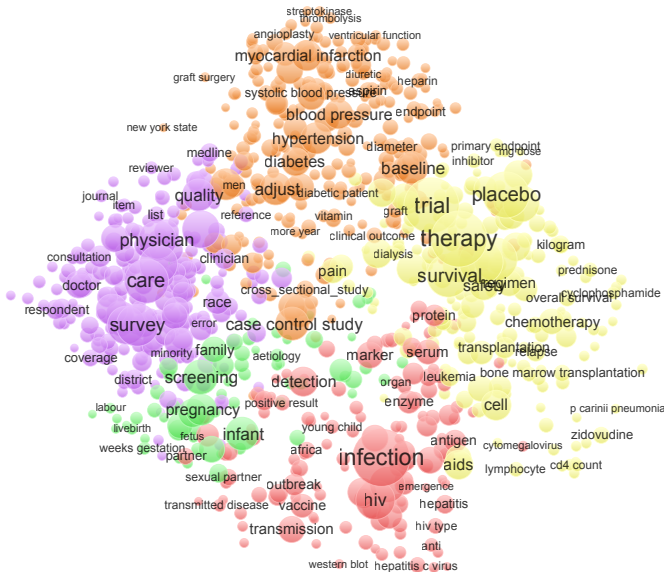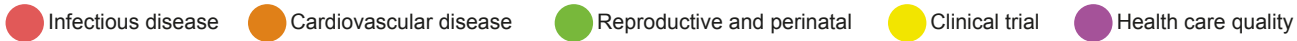

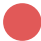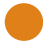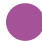



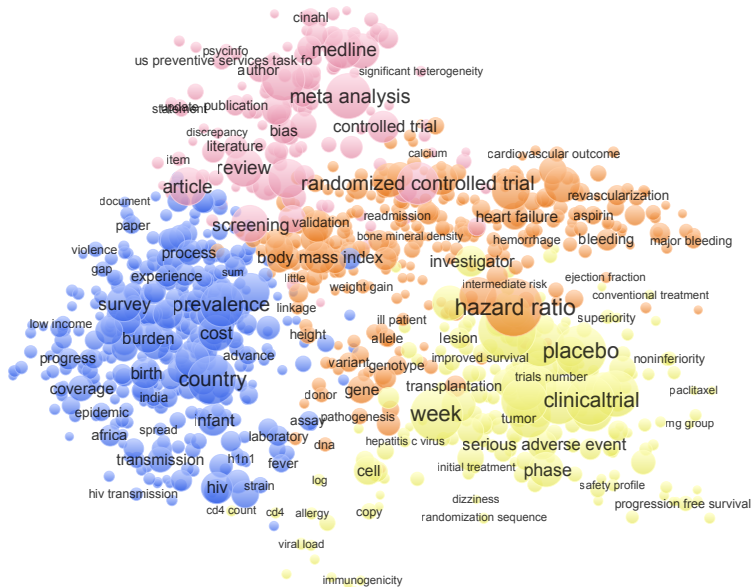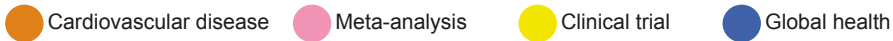

Supplement: kwv034_Supplementary_Data.zip [file kwv034_Supplementary_Data.zip]
